# Supplementary material for: Concise asymmetric synthesis of two natural oxacyclododecindione-type macrolactones from industrial waste
Source: Royal Society of Chemistry journal article supplement (doi:10.1039/d0ra02994g), 2020-01-01

## **Concise asymmetric synthesis of two natural oxacyclododecindione-type macrolactones from industrial waste**

Xian Liu,<sup>a</sup> Huifang Nie,<sup>a</sup> Lin Yao,<sup>a</sup> Ru Jiang,<sup>\*a</sup> and Weiping Chen<sup>\*a</sup>

---

*<sup>a</sup>School of Pharmacy, Fourth Military Medical University, 169 Changle West Road, Xi'an, 710032, P. R. China.*

**(*S,E*)-tert-Butyl 7-hydroxy-2,6-dimethylhept-2-enoate (*S,E*)-9**

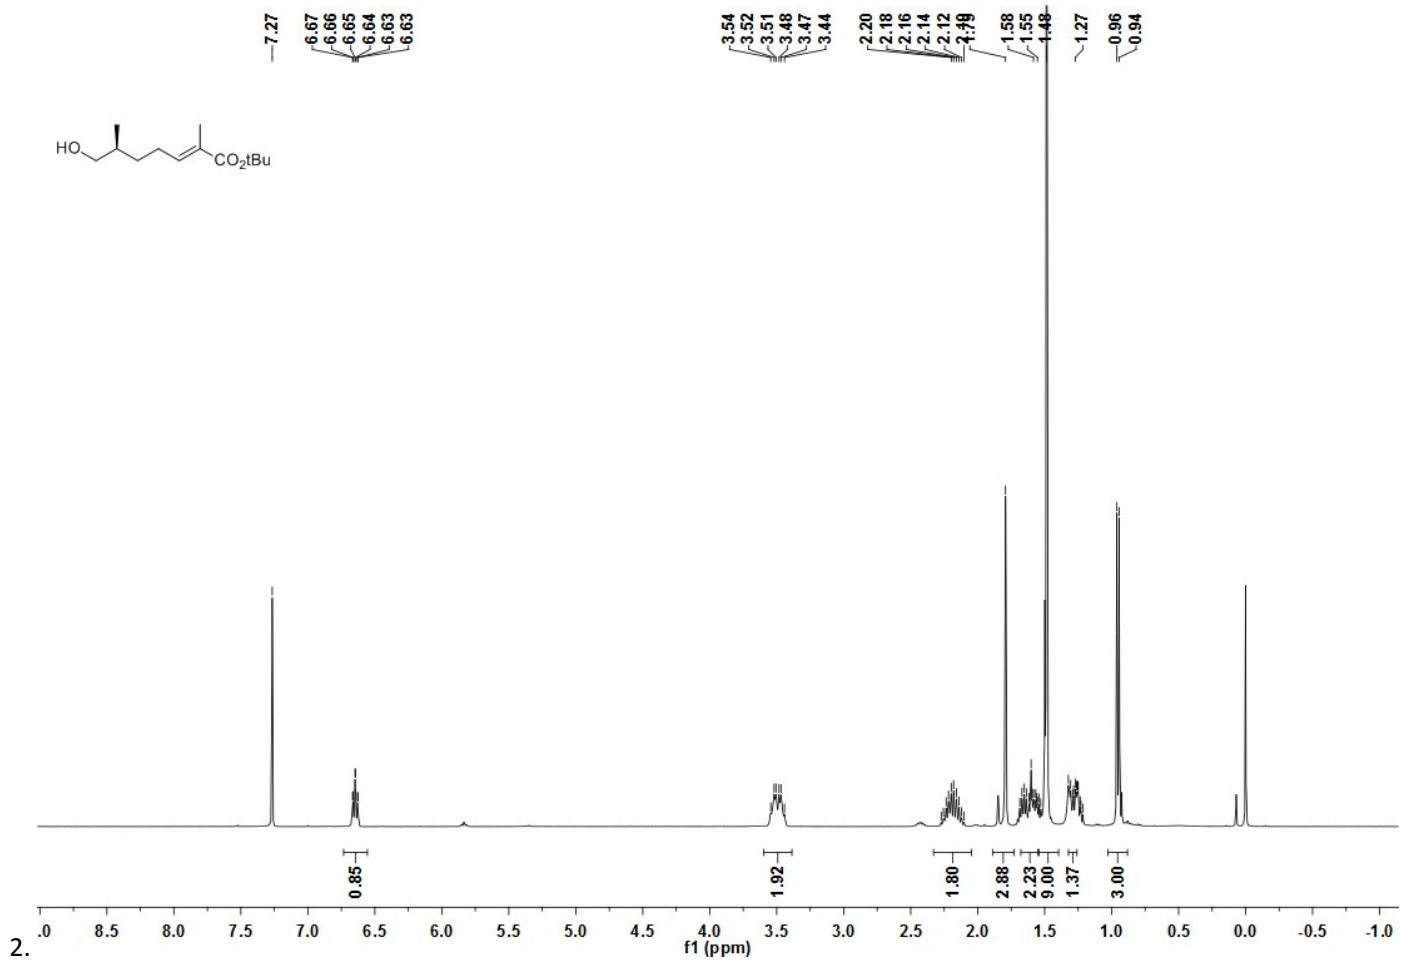

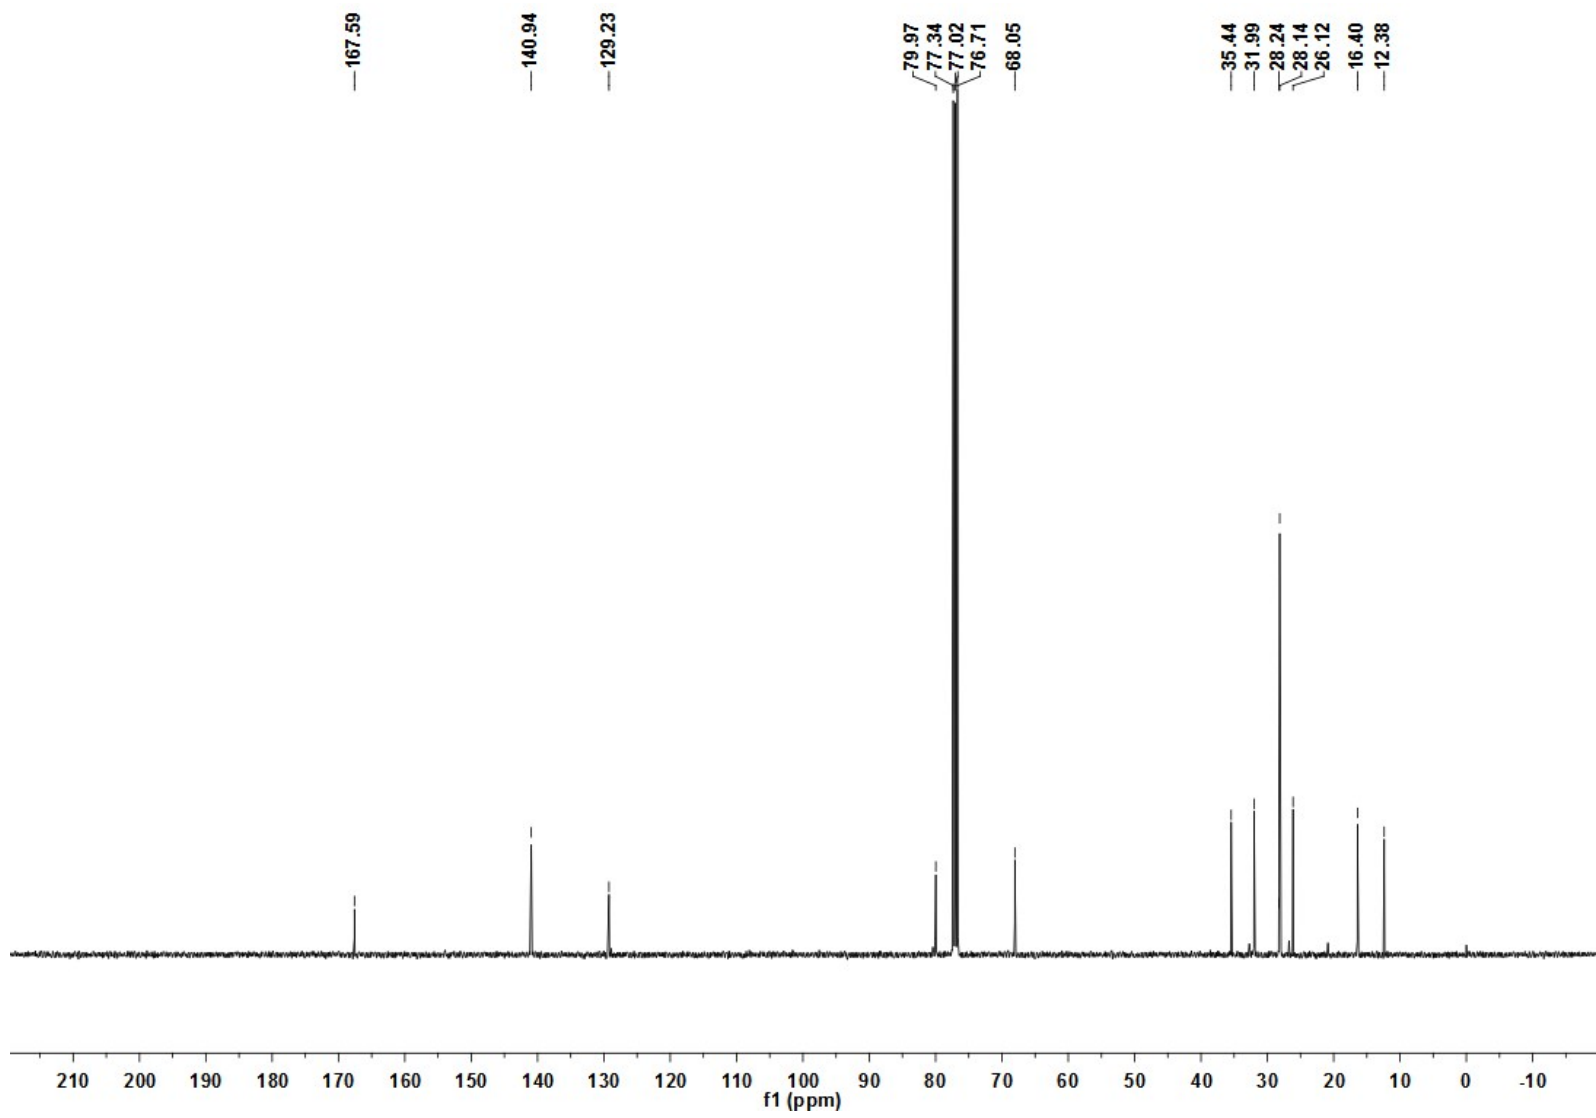

**(6*S*,7*S*,*E*)-tert-Butyl-7-hydroxy-2,6-dimethyloct-2-enoate (6*S*,7*S*,*E*)-7:**

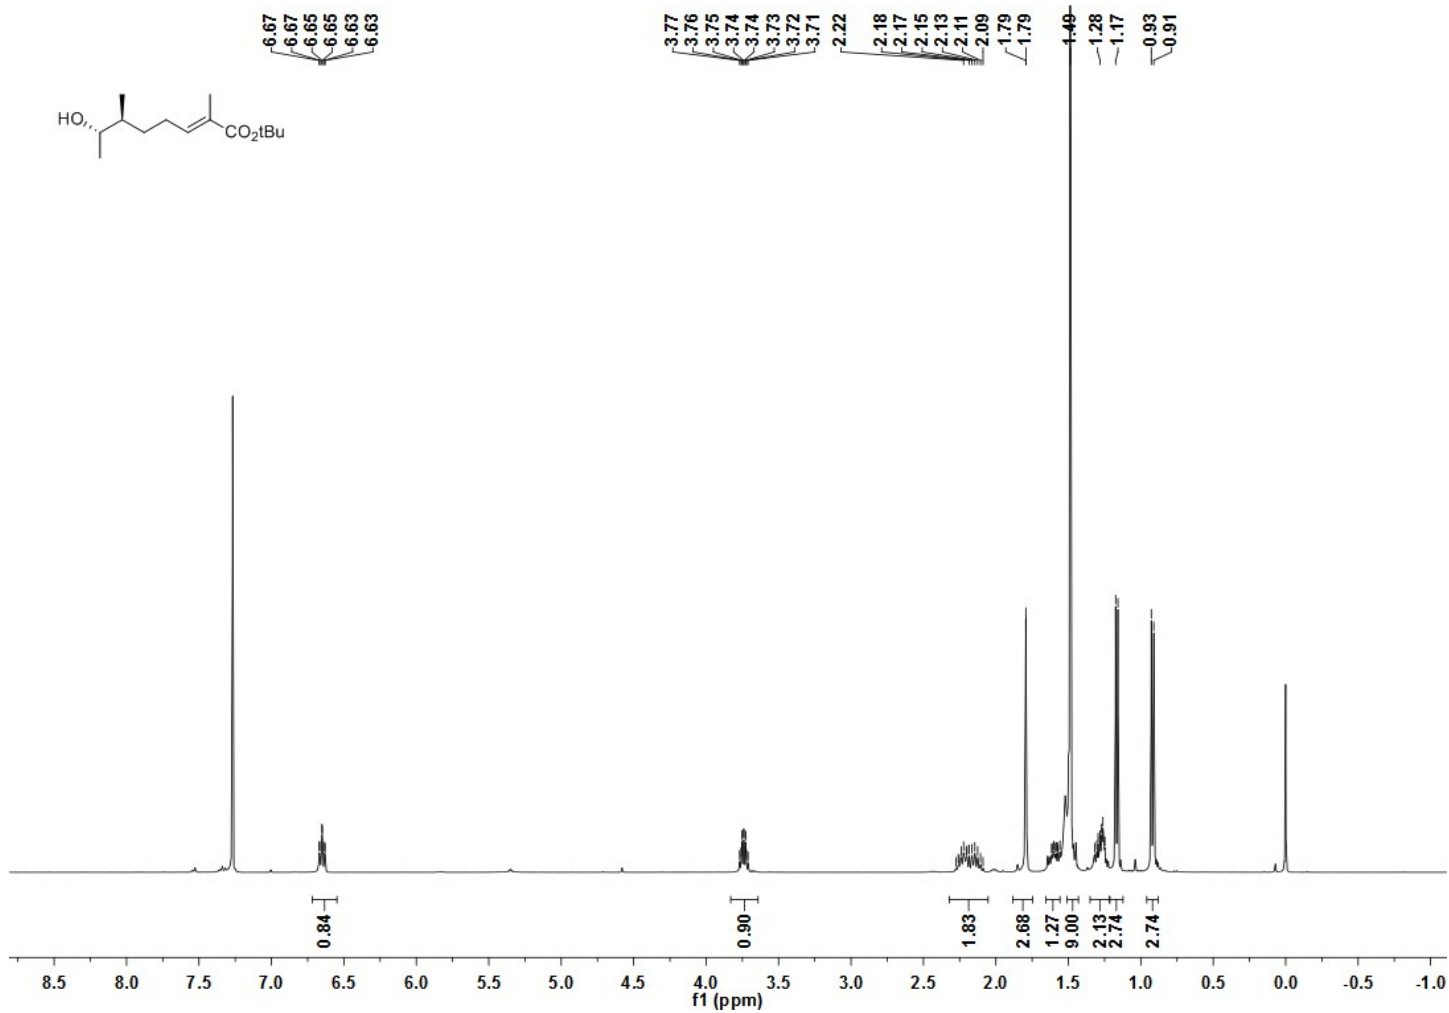

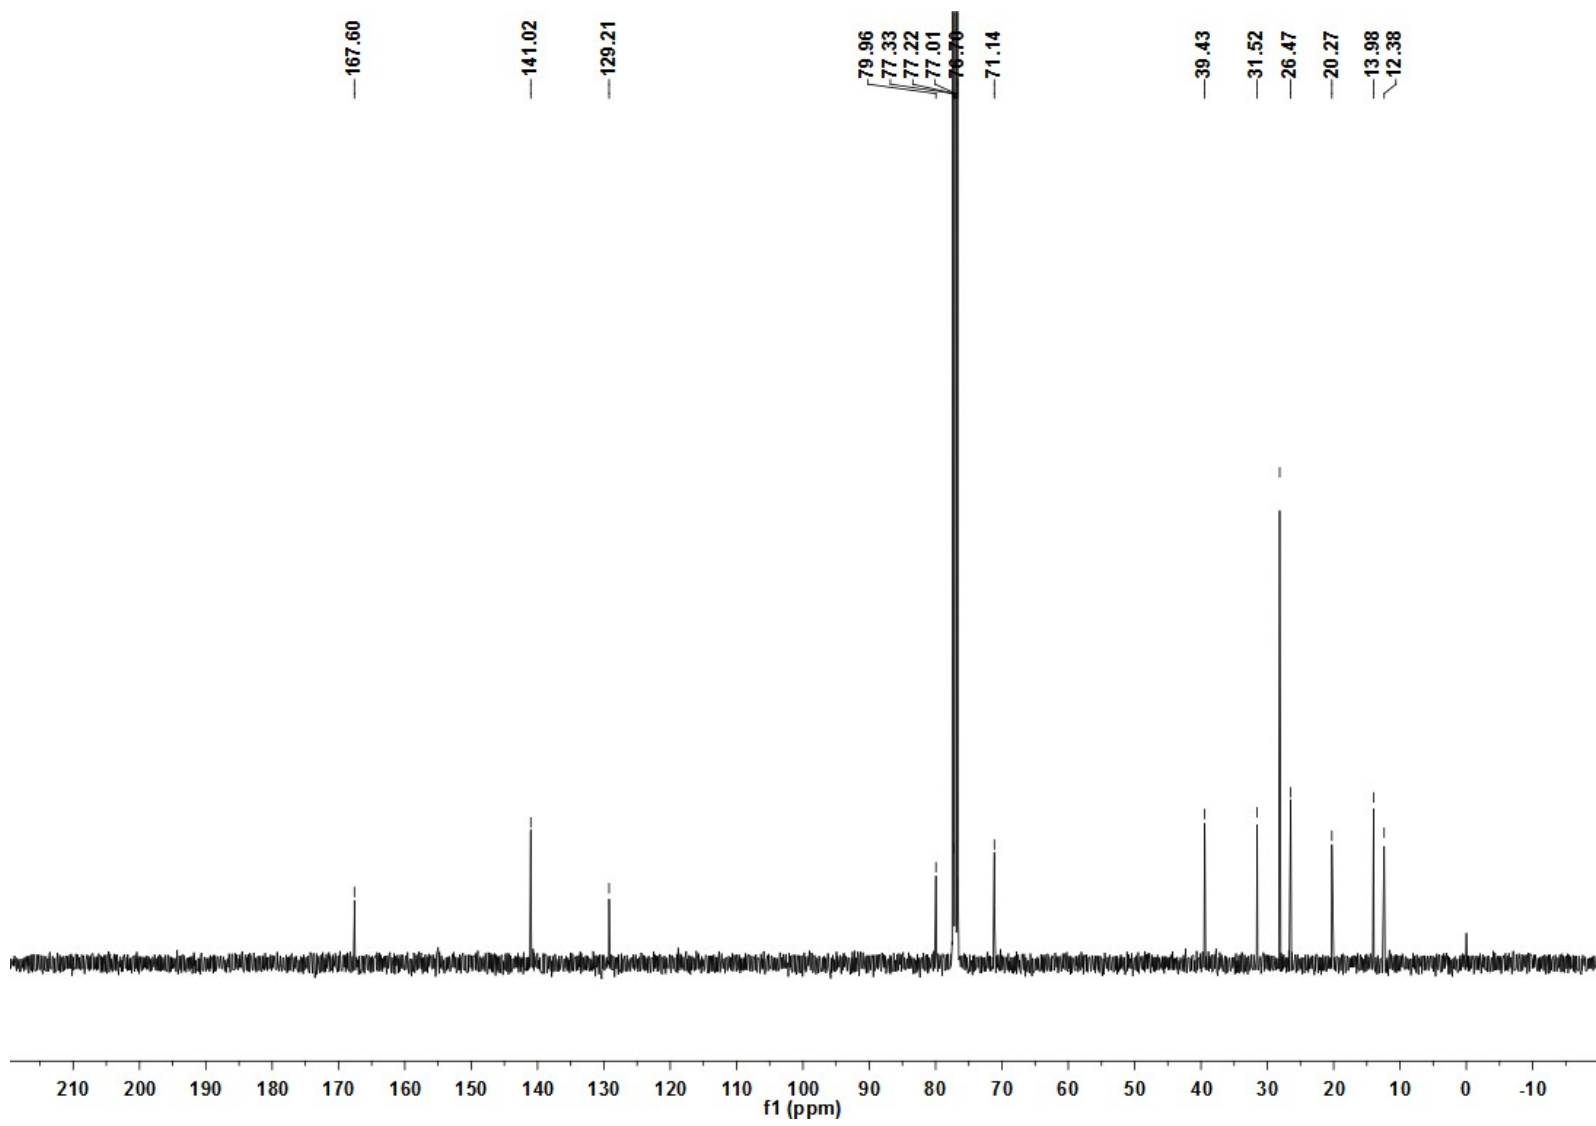

**(*S,E*)-9 catalyzed by (*S,S*)-Taddol**

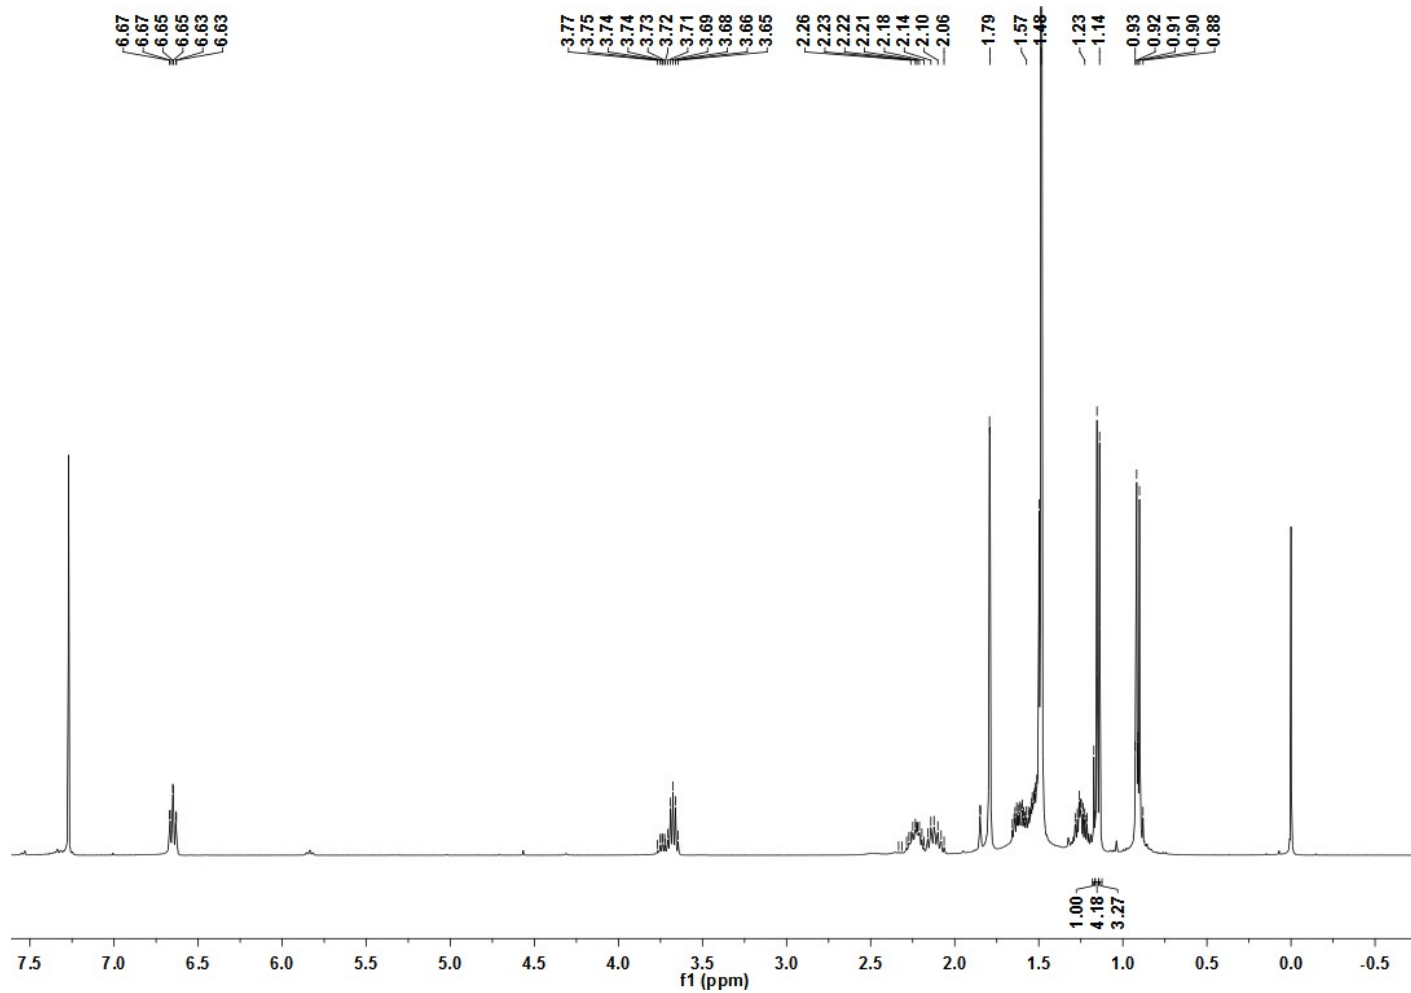

**(6*S*,7*R*,*E*)-tert-butyl-7-(2-(3,5-bis(benzyloxy)phenyl)acetoxy)-2,6-dimethyloct-2-enoate (6*S*,7*R*,*E*)-5:**

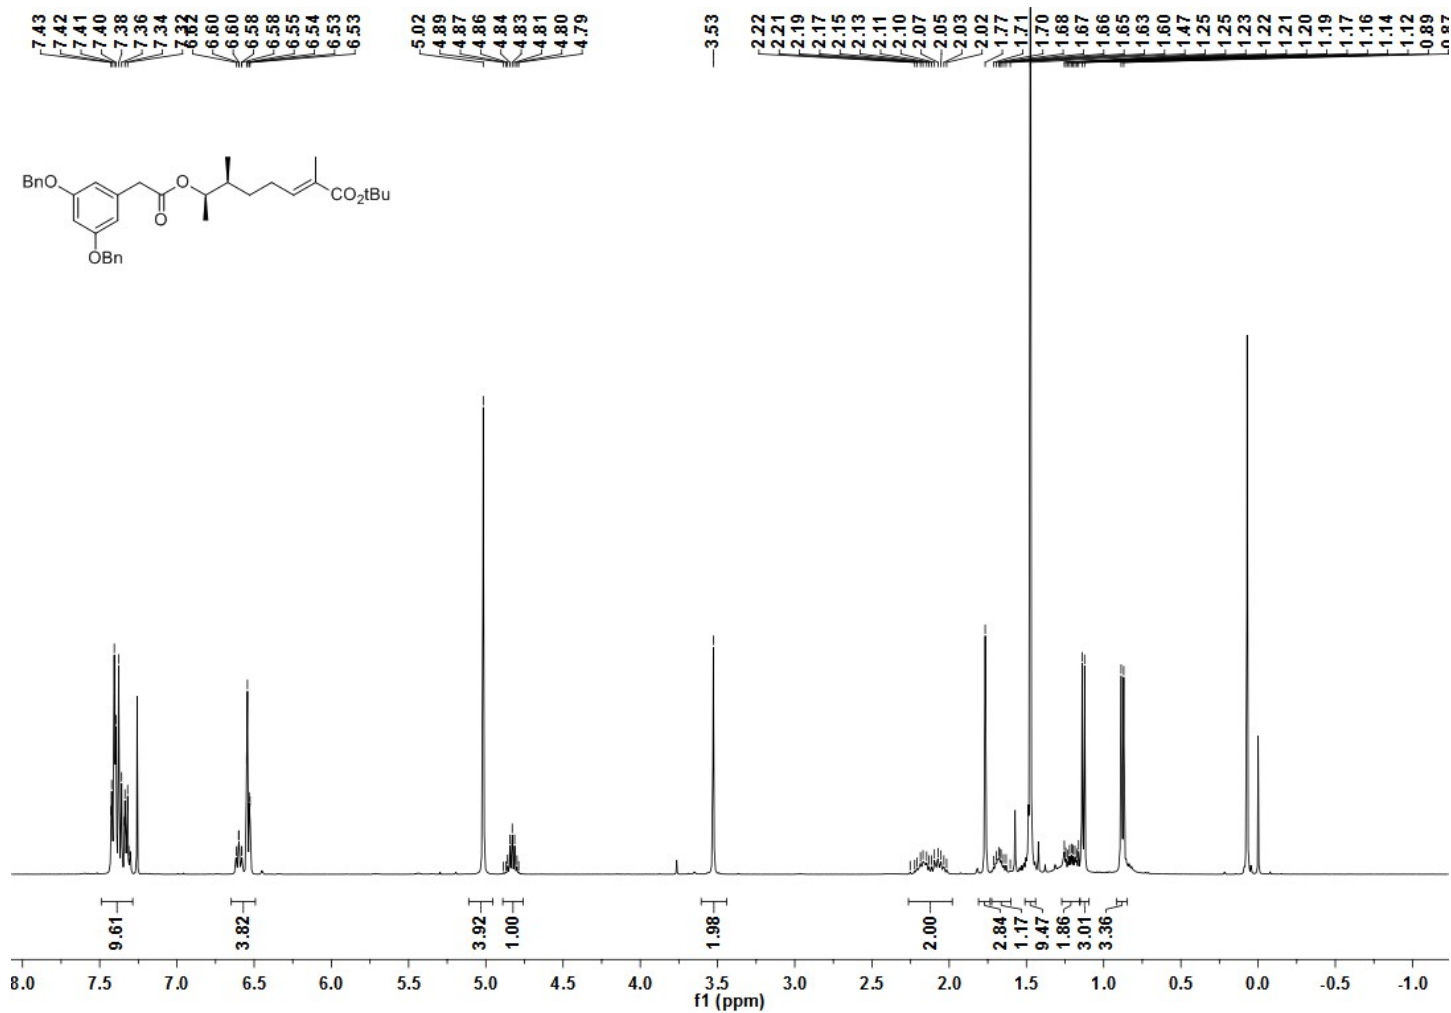

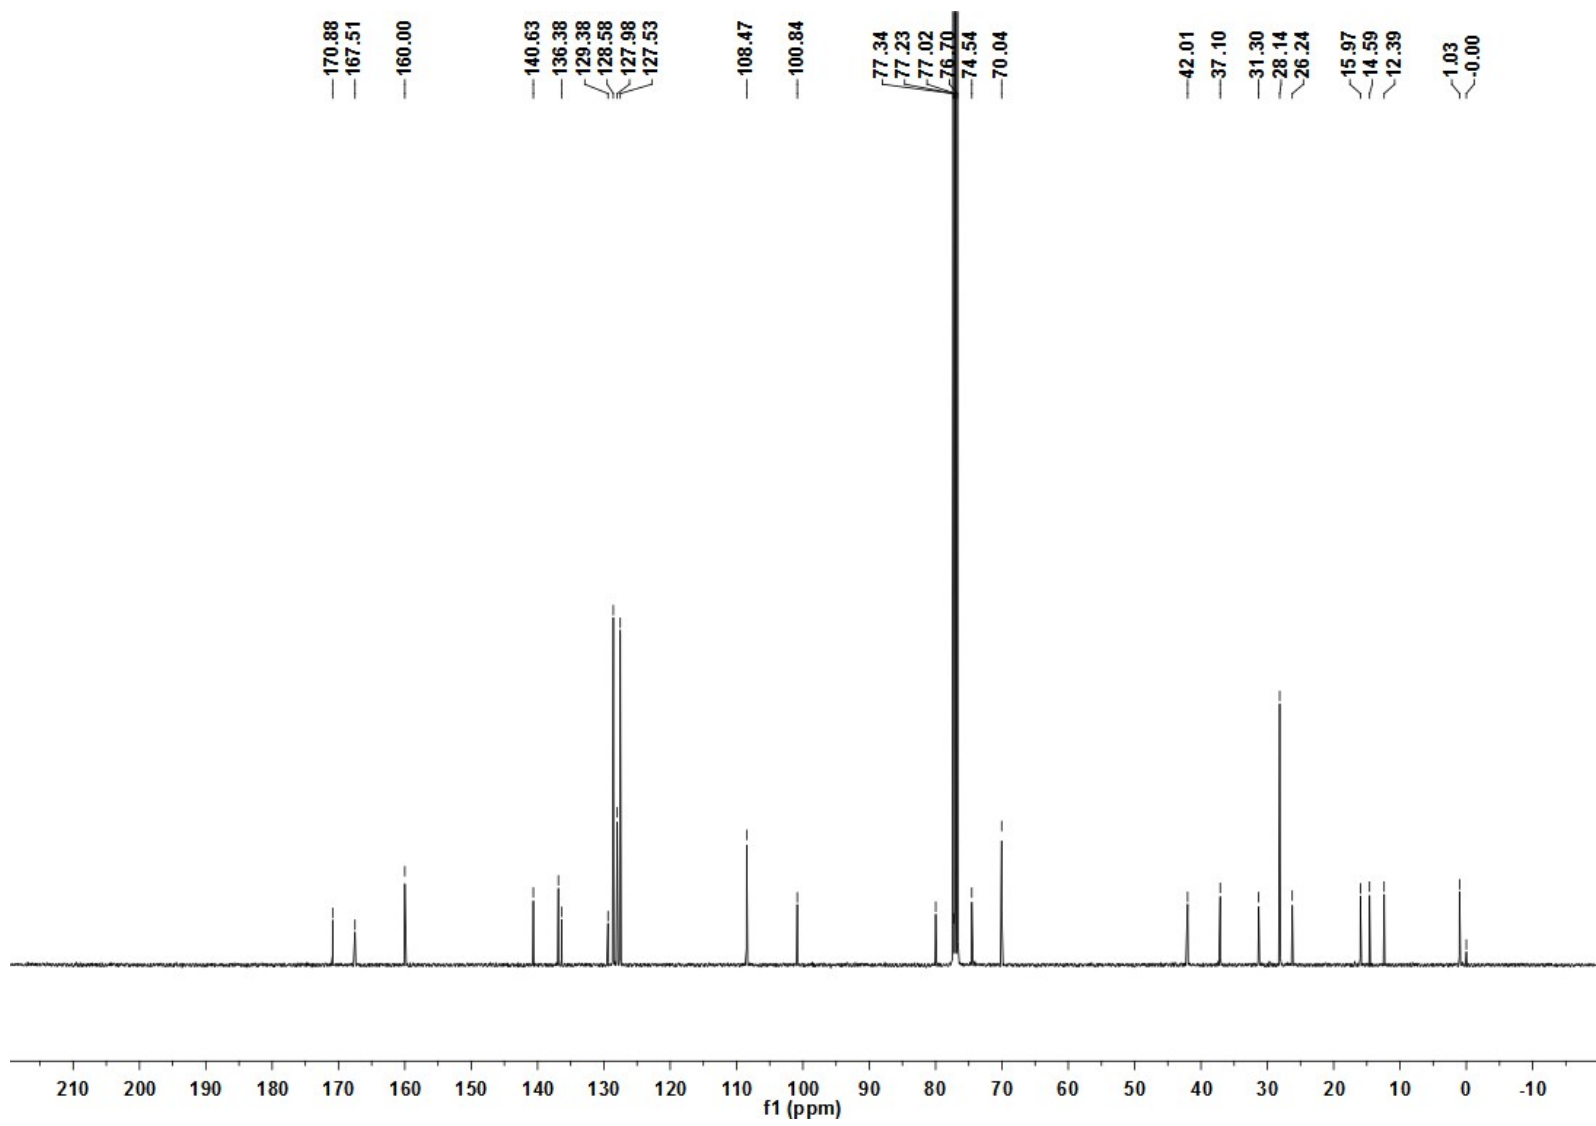



**(14*S*,15*R*)-5,7-Di-O-benzyl-4-dechloro-14-deoxyoxacyclodode-cindione :(14*S*,15*R*)-12:**

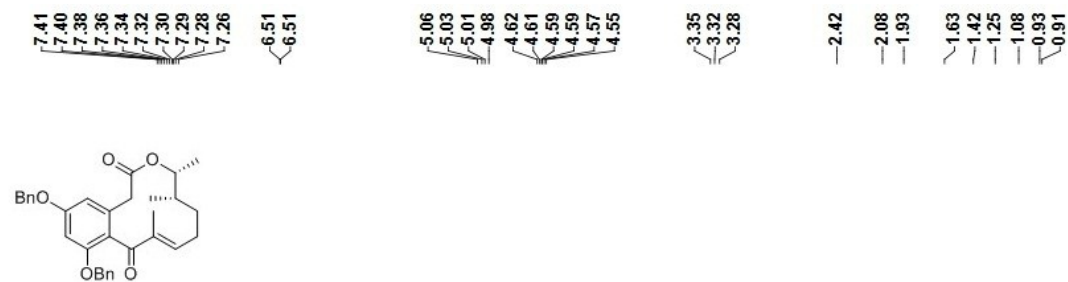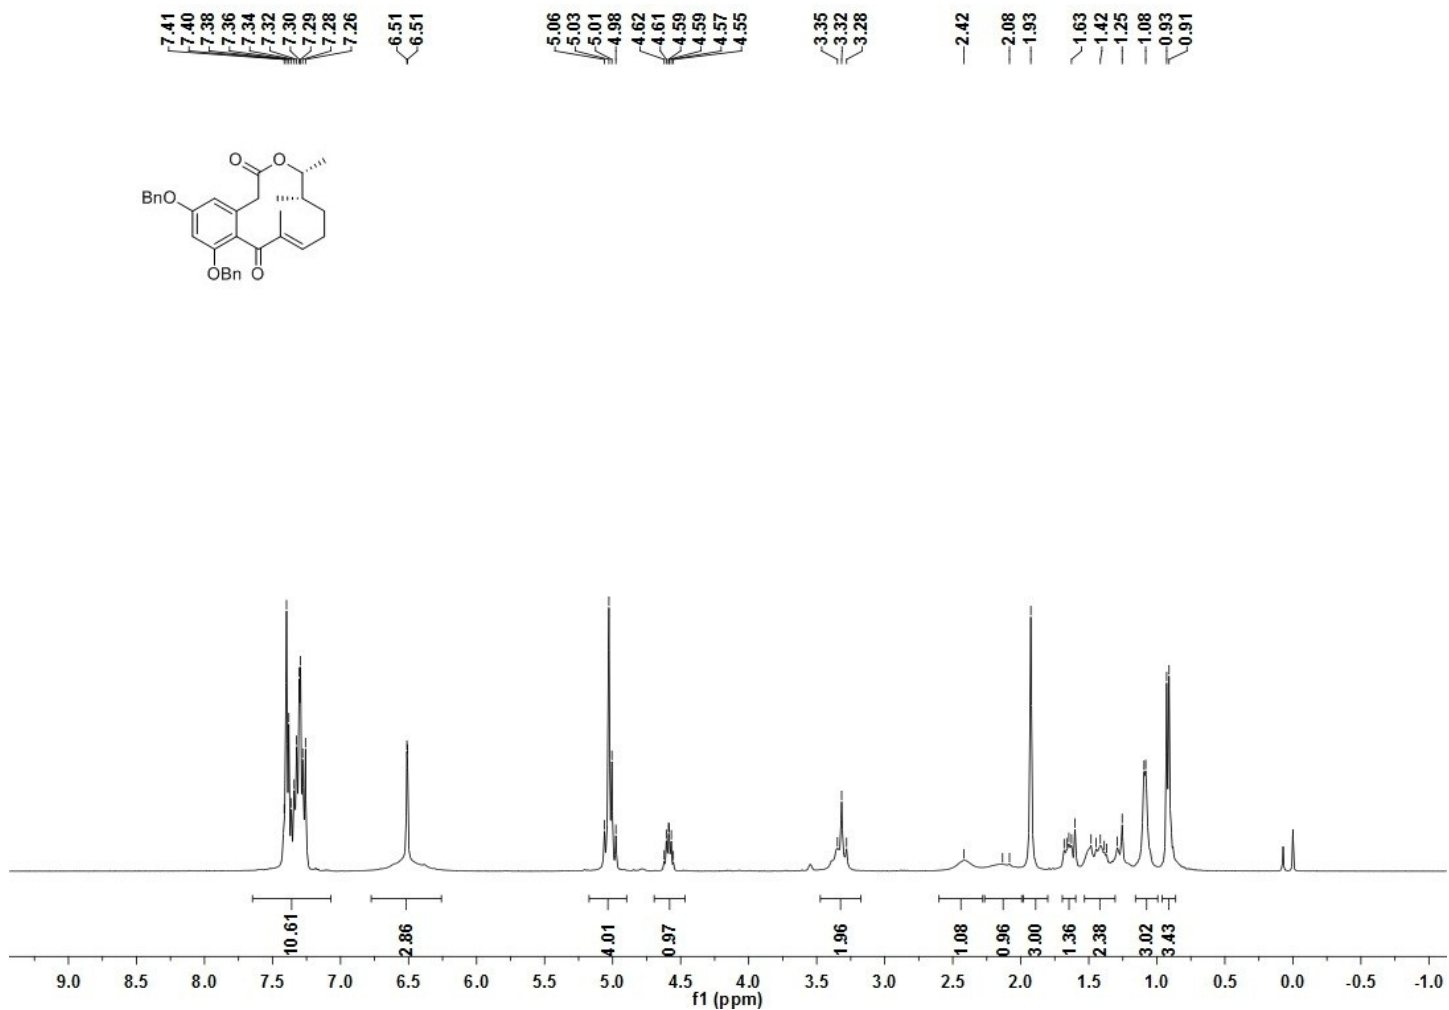

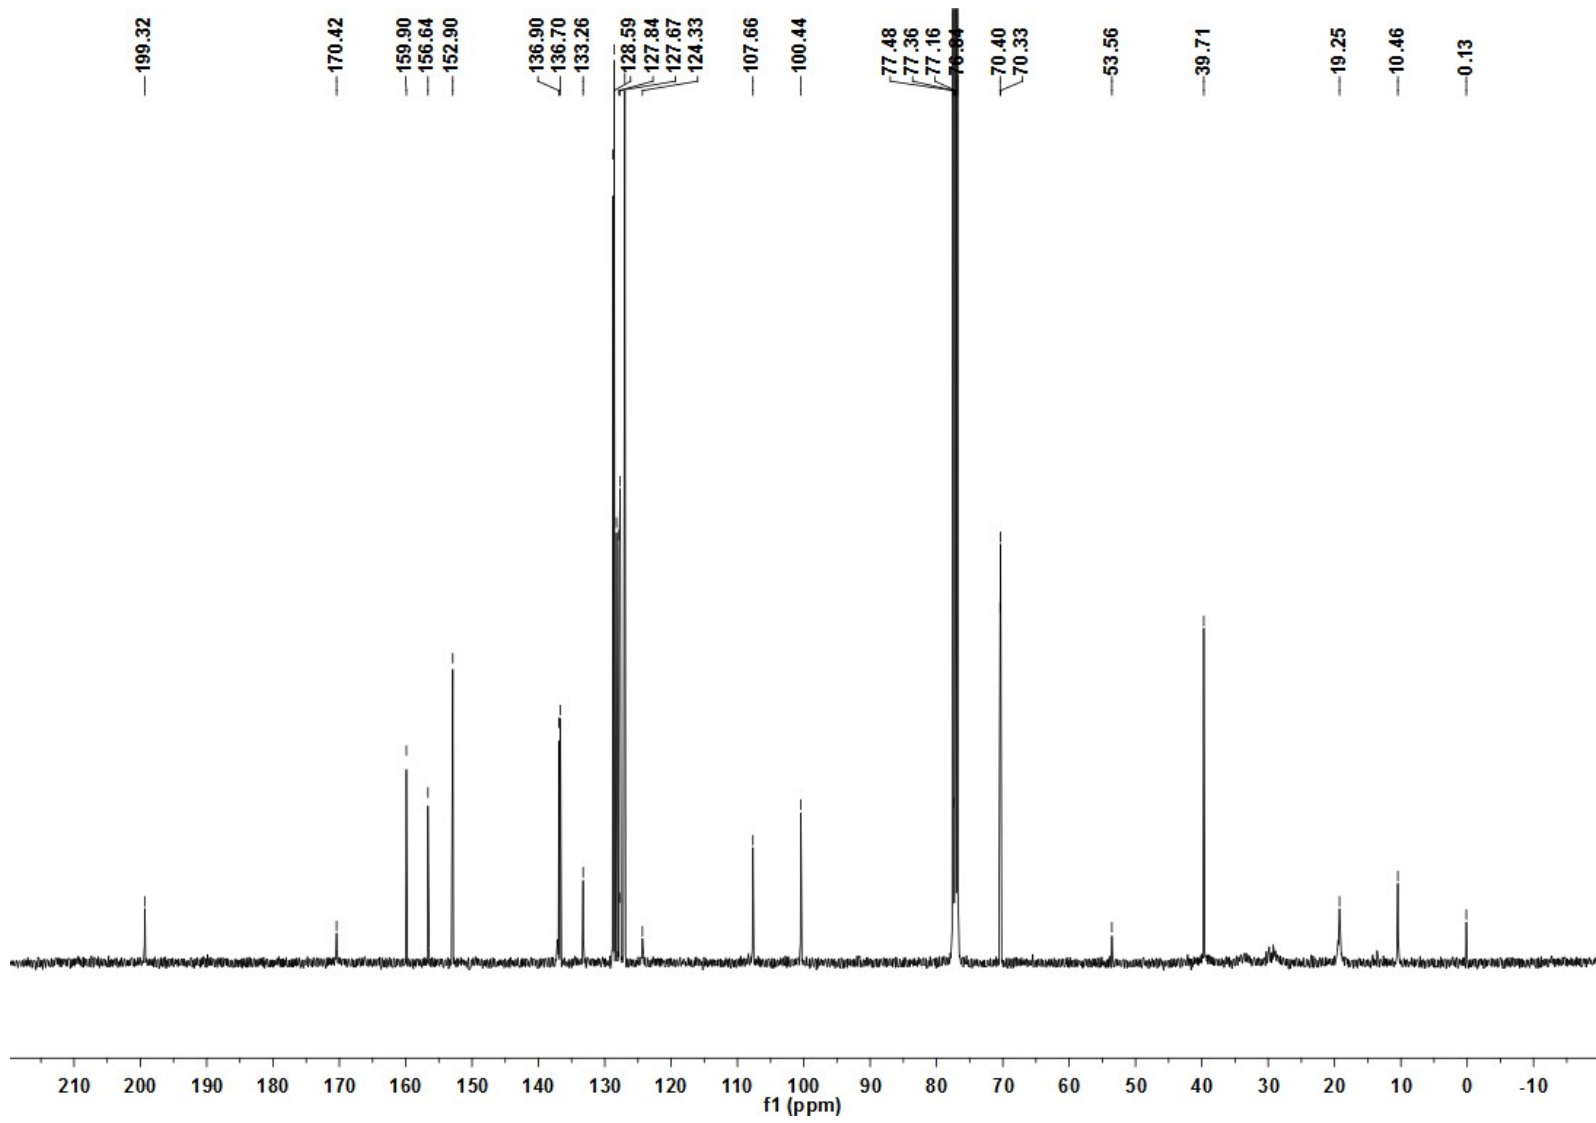

**(14*S*,15*R*)-4-Dechloro-14-deoxyoxacyclododecindione (14*S*,15*R*)-2:**

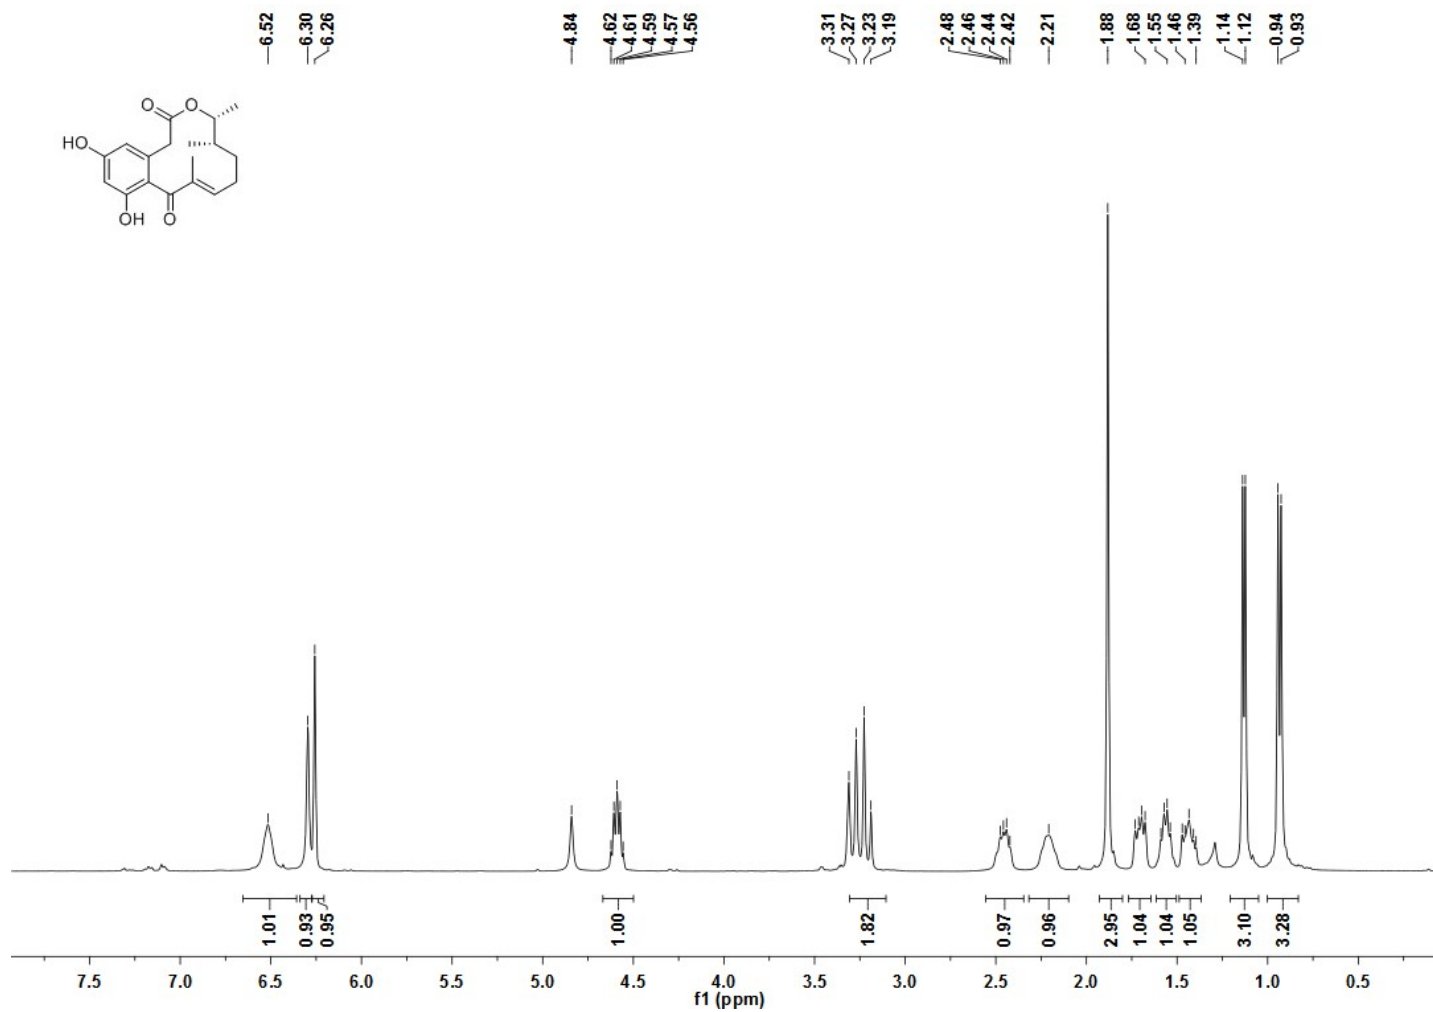

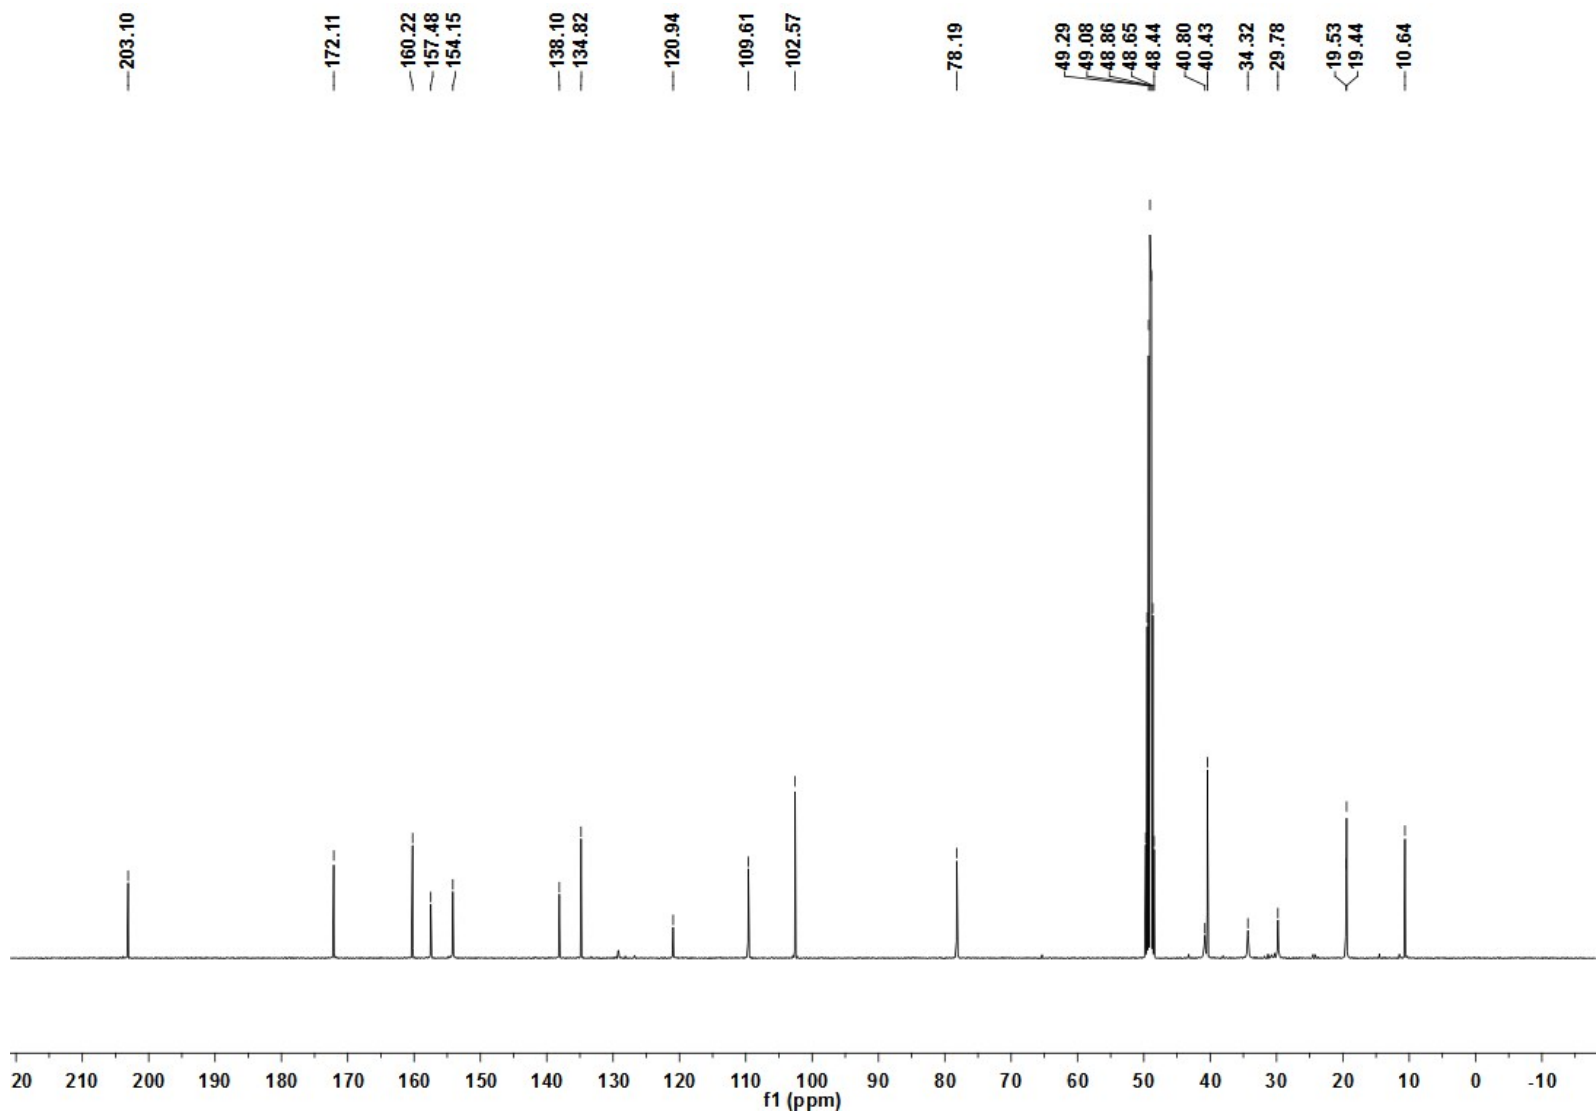

**(14*S*,15*R*)-4-Deoxyoxacyclododecindione (14*S*,15*R*)-3:**

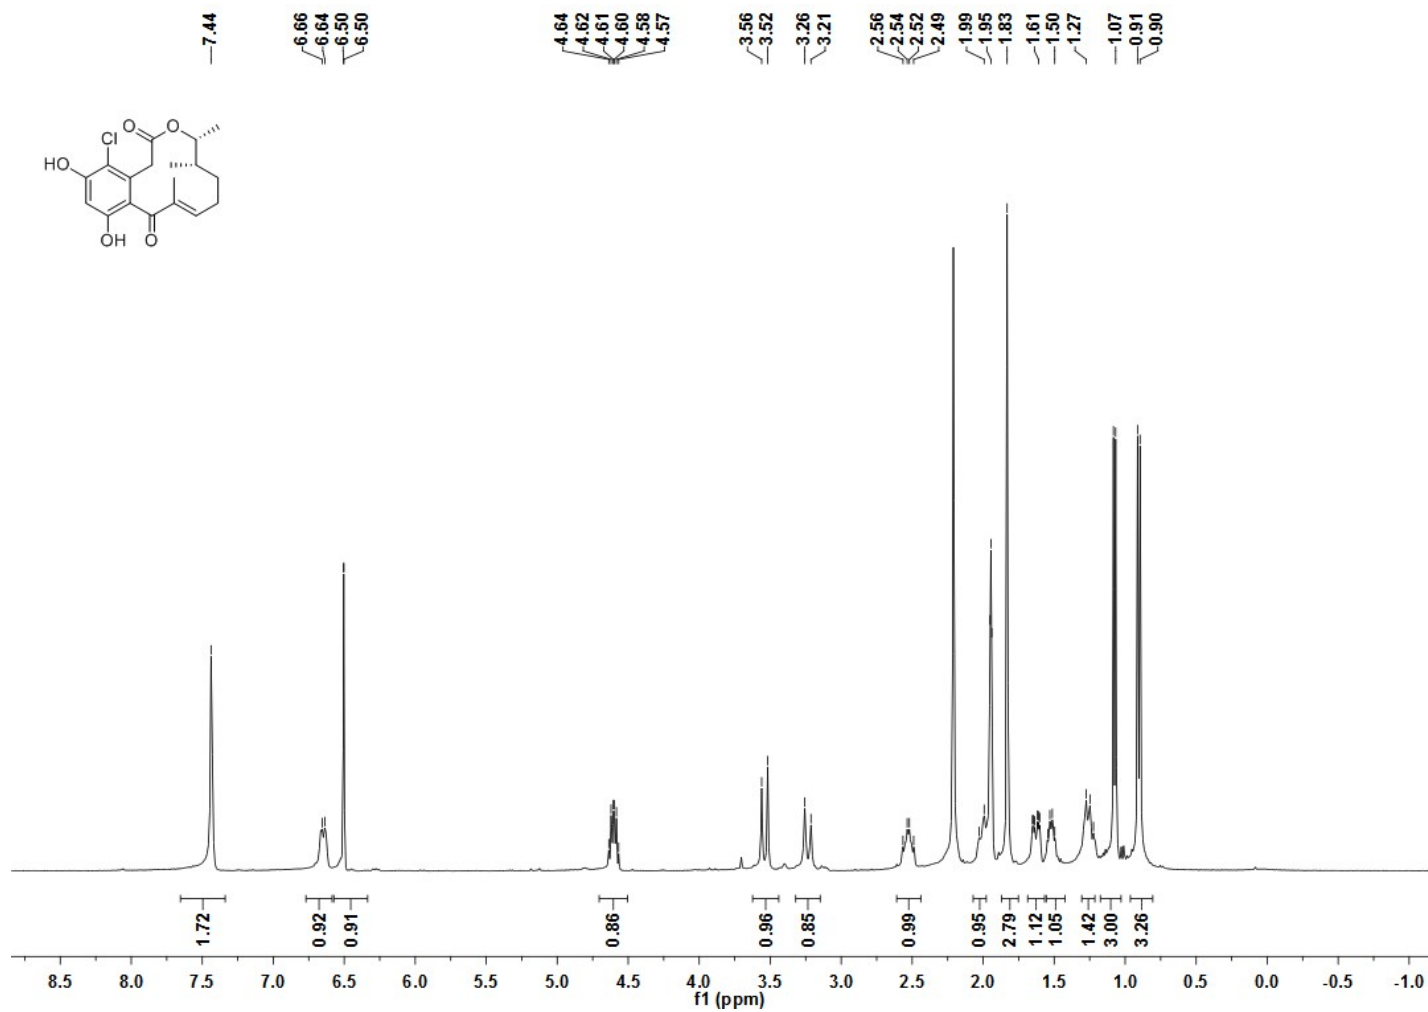

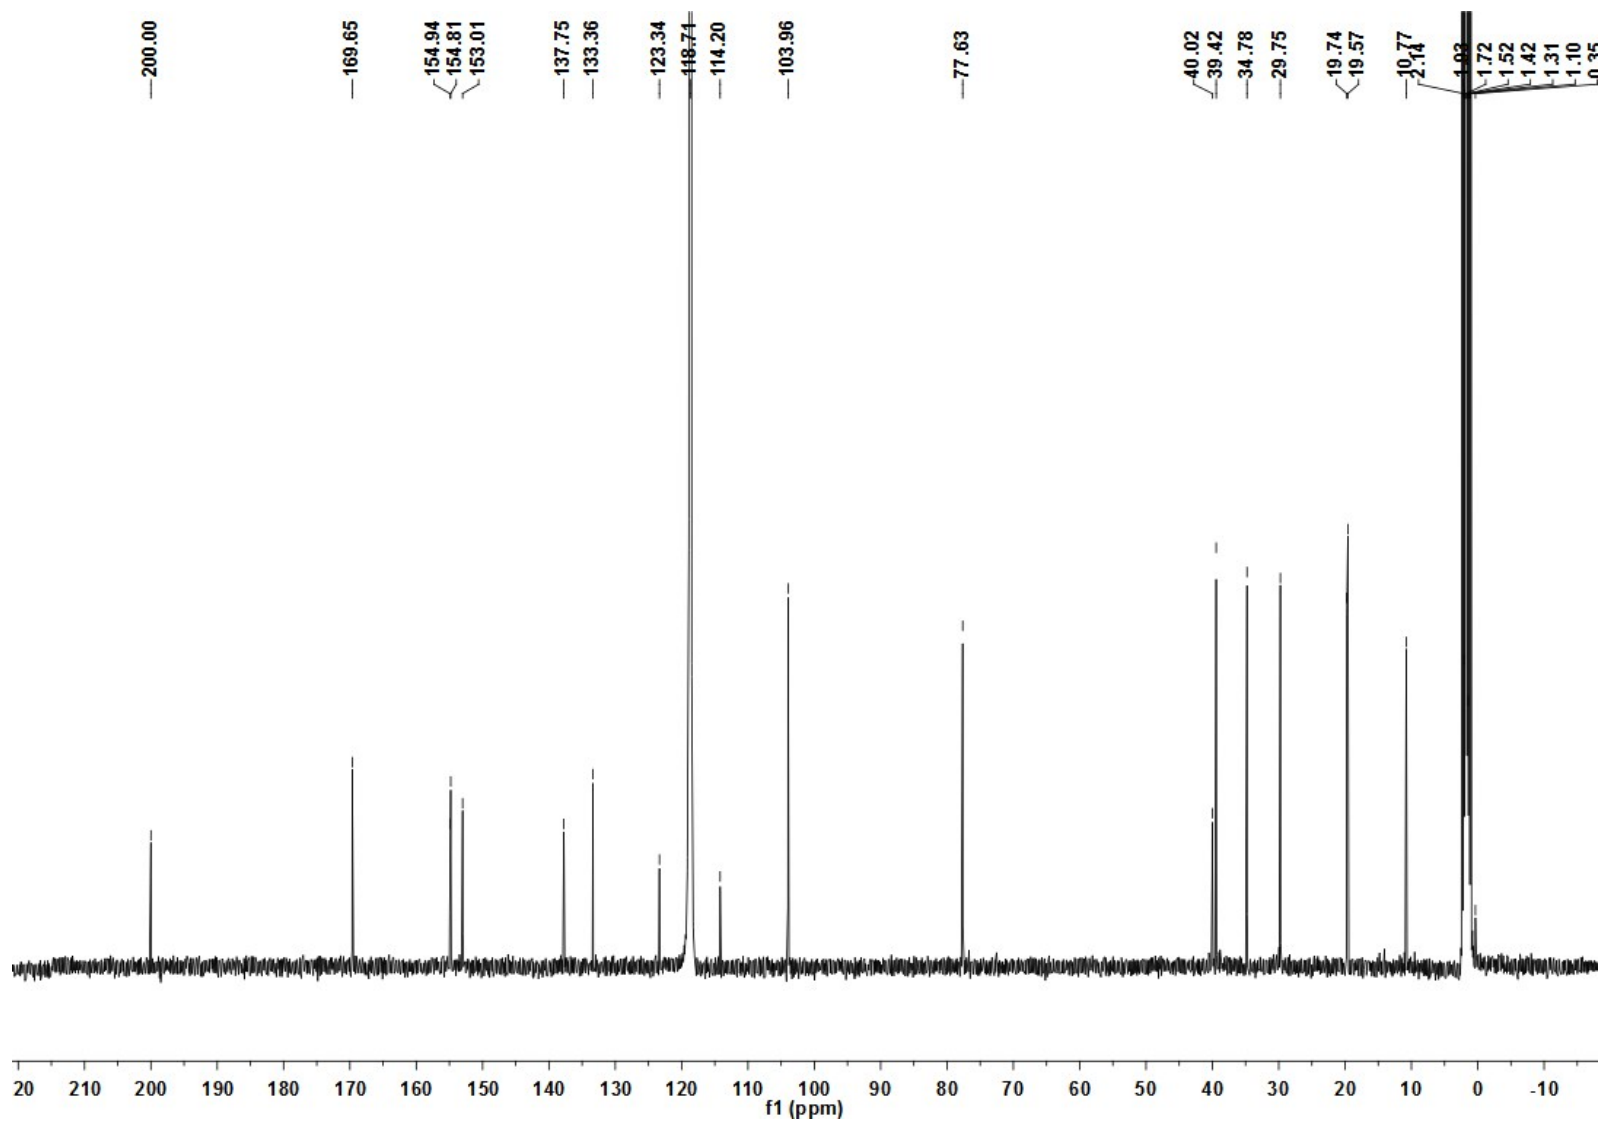

Supplement: d0ra02994g1.pdf [file d0ra02994g1.pdf]
